# Supplementary material for: Gamma-Klotho exhibits multiple roles in tumor growth of human bladder cancer
Source: PubMed Central journal article supplement (PMC5929405; doi:10.18632/oncotarget.24628), 2018-04-13
Supplement: oncotarget-09-19508-s001.pdf [file oncotarget-09-19508-s001.pdf]

## Gamma-Klotho exhibits multiple roles in tumor growth of human bladder cancer

### SUPPLEMENTARY MATERIALS

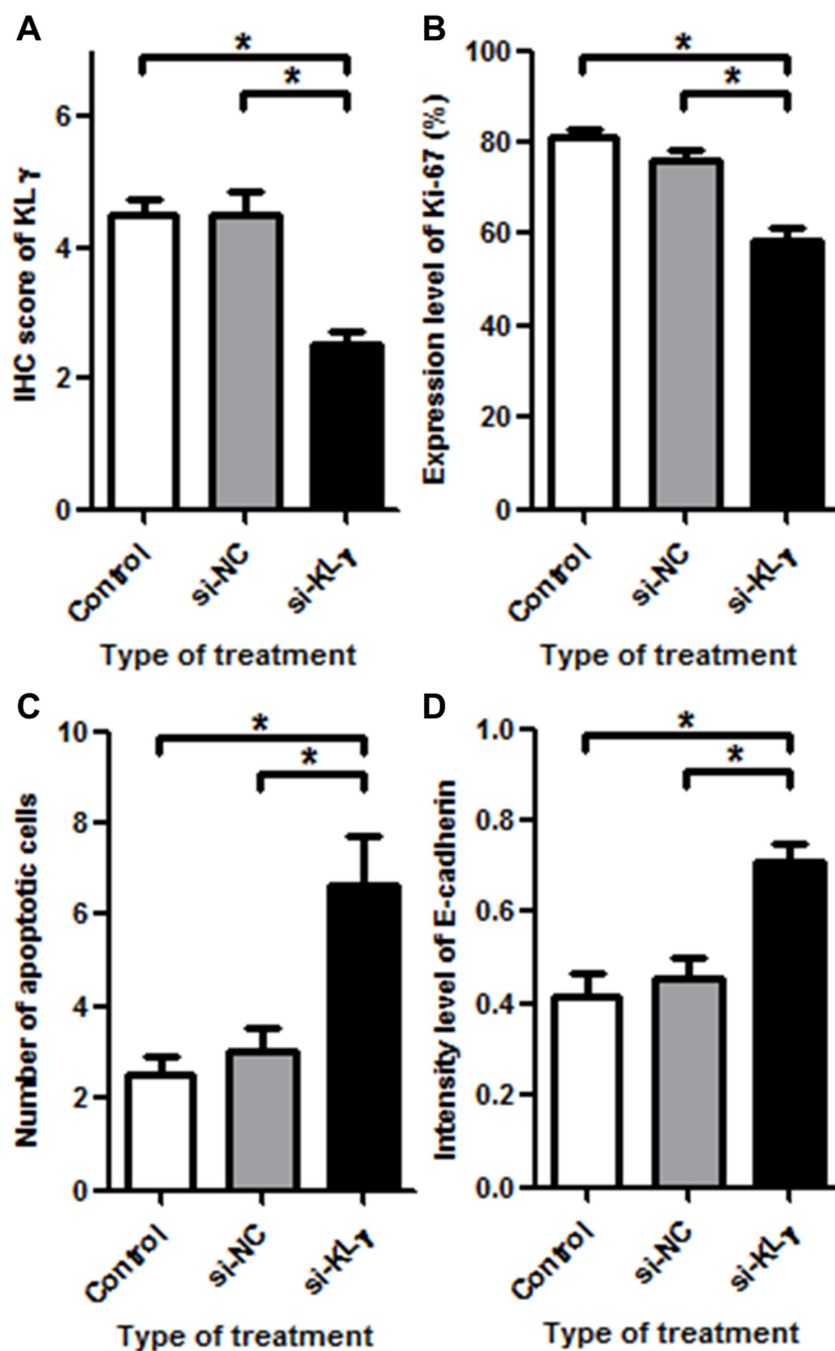

**Supplementary Figure 1: Relative expression level of each marker (KL $\gamma$ , Ki-67, TUNEL, and E-cadherin) in each treatment group.** The expression levels of KL $\gamma$  and Ki-67 decreased in tumors of mice treated with KL $\gamma$  siRNA. On the other hand, the expression levels of TUNEL and E-cadherin increased in tumors of mice treated with KL $\gamma$  siRNA (Mann-Whitney U test; \* =  $P < 0.05$ ).
